# Supplementary material for: Genome-wide systematic characterization of the HAK/KUP/KT gene family and its expression profile during plant growth and in response to low-K+ stress in Saccharum
Source: BMC Plant Biol. 2020 Jan 13;20:20. doi: 10.1186/s12870-019-2227-7 (PMC6958797; doi:10.1186/s12870-019-2227-7)
Supplement: Supplementary file 1 — Additional file 1. The HAK gene alleles in Saccharum spontaneum. [file 12870_2019_2227_MOESM1_ESM.xlsx]

## Sheet: Sheet1
Additional file 1 The HAK gene alleles in S. spontaneum
				Allele A		Allele B		Allele C		Allele D
Gene name	Representive Gene model	Chr	Sorghum homologs ID	Gene ID	Chromosome position	Gene ID	Chromosome position	Gene ID	Chromosome position	Gene ID	Chromosome position
SsHAK1	Sspon.005D0017640	5	Sobic.006G061300	Sspon.005A0015501	Chr5A:36963664-36967280			Sspon.005C0012160	Chr5C:29219229-29225124	Sspon.005D0017640|Sspon.005D0017830	Chr5D:38688621-38691883|Chr5D:39852579-39855813
SsHAK2	Sspon.003C0005051	3	Sobic.003G418100			Sspon.003B0002340|Sspon.003B0002360	Chr3B:5341322-5360454|Chr3B:5364633-5369312	Sspon.003C0005051	Chr3C:9390241-9395729
SsHAK3	Sspon.003C0025790	3	Sobic.003G164400	Sspon.003A0017591	Chr3A:43968136-43971592	Sspon.003B0022421	Chr3B:65846309-65849069	Sspon.003C0025790	Chr3C:63264639-63267398
SsHAK4	Sspon.006D0006310	6	Sobic.007G153001			Sspon.006B0006451	Chr6B:14299538-14301821	Sspon.006C0006940	Chr6C:15389397-15393991	Sspon.006D0006310	Chr6D:14519353-14521594
SsHAK5a	Sspon.003C0005462	3	Sobic.003G413700			Sspon.003B0002930	Chr3B:6450759-6464402	Sspon.003C0005462	Chr3C:9929473-9933613
SsHAK5b	Sspon.003C0005461	3	Sobic.003G413600					Sspon.003C0005461	Chr3C:9920819-9925911
SsHAK7	Sspon.002C0001831	2	Sobic.002G411500	Sspon.002A0001870	Chr2A:4744687-4750185	Sspon.002B0002840	Chr2B:7945977-7949579	Sspon.002C0001831|Sspon.002C0001830	Chr2C:5395698-5401455|Chr2C:5386486-5392168	Sspon.002D0000820	Chr2D:2296517-2301930
SsHAK8	Sspon.001B0035350	1	Sobic.001G379900			Sspon.001B0035350	Chr1B:94085009-94090207	Sspon.001C0011860	Chr1C:26889529-26894733
SsHAK9	Sspon.002D0001210	2	Sobic.002G417500	Sspon.002A0001400	Chr2A:3679307-3683596	Sspon.002B0000842	Chr2B:4338944-4342881	Sspon.002C0001420	Chr2C:4168695-4173242	Sspon.002D0001210	Chr2D:3147203-3151677
SsHAK10	Sspon.008B0007270	8	Sobic.010G197500	Sspon.008A0007021	Chr8A:16729297-16734434	Sspon.008B0007270	Chr8B:13715783-13719863	Sspon.008C0007631	Chr8C:16864297-16868512	Sspon.008D0006580	Chr8D:14267976-14273417
SsHAK11	Sspon.005D0006395	5	Sobic.006G213500	Sspon.005A0003580	Chr5A:7838897-7844152					Sspon.005D0006395	Chr5D:12454267-12459504
SsHAK12	Sspon.006B0011890	6	Sobic.007G075100	Sspon.006A0012490	Chr6A:49677327-49682007	Sspon.006B0011890	Chr6B:39862476-39866652	Sspon.006C0012490	Chr6C:41775821-41780849	Sspon.006D0011780	Chr6D:38531227-38535242
SsHAK13	Sspon.008C0005071	8	Sobic.010G224400			Sspon.008B0004961	Chr8B:8997554-9007145	Sspon.008C0005071	Chr8C:11327953-11335926	Sspon.008D0004270	Chr8D:8451897-8461146
SsHAK14	Sspon.002C0010161	2	Sobic.002G313900	Sspon.002A0009270	Chr2A:20552439-20557527			Sspon.002C0010161	Chr2C:21608869-21634275	Sspon.002D0006450	Chr2D:14622539-14628027
SsHAK15	Sspon.005D0006660	5	Sobic.006G210700					Sspon.005C0001192	Chr5C:2989046-2993553	Sspon.005D0006660|Sspon.005D0006570	Chr5D:13165576-13170840|Chr5D:12983093-12988296
SsHAK16a	Sspon.001D0027970	1	Sobic.001G184000							Sspon.001D0027970	Chr1D:79361674-79364371
SsHAK16b	Sspon.001B0031640	1	Sobic.001G184100			Sspon.001B0031640	Chr1B:84604536-84608721	Sspon.001C0001080	Chr1C:3021820-3025745	Sspon.001D0027990	Chr1D:79430607-79434766
SsHAK17	Sspon.002B0014291	2	Sobic.002G220600	Sspon.002A0017561	Chr2A:36281946-36285435	Sspon.002B0014291	Chr2B:33892178-33894950	Sspon.002C0017840	Chr2C:38709771-38713479
SsHAK18	Sspon.002A0024442	2	Sobic.002G130800	Sspon.002A0024442	Chr2A:61368030-61372441	Sspon.002B0021931	Chr2B:62828195-62832196	Sspon.002C0024621	Chr2C:64160604-64166594	Sspon.002D0020600	Chr2D:56819520-56825221
SsHAK19a	Sspon.001A0020471	1	Sobic.006G062100	Sspon.001A0020471	Chr1A:56343211-56346640
SsHAK19b	Sspon.005C0012110	5	Sobic.006G062100	Sspon.005A0015500	Chr5A:36939546-36942765			Sspon.005C0012110	Chr5C:29156984-29168426
SsHAK20a	Sspon.004D0016040	4	Sobic.004G160000	Sspon.004A0014200	Chr4A:34927887-34930767	Sspon.004B0014691	Chr4B:40502529-40505383	Sspon.004C0014560	Chr4C:33939880-33942913	Sspon.004D0016040	Chr4D:37616777-37619659
SsHAK20b	Sspon.005D0017621	5	Sobic.006G061700	Sspon.005A0015510	Chr5A:37053052-37057037			Sspon.005C0012170	Chr5C:29276121-29303527	Sspon.005D0017621	Chr5D:38562588-38573475
SsHAK21	Sspon.001C0027080	1	Sobic.001G183700			Sspon.001B0031671	Chr1B:84733497-84737178	Sspon.001C0027080	Chr1C:80695896-80699577	Sspon.001D0028031	Chr1D:79531725-79535409
SsHAK22	Sspon.002A0035140	2	Sobic.002G001800	Sspon.002A0035140	Chr2A:91966339-91974354
SsHAK23	Sspon.002D0016171	2	Sobic.002G188600	Sspon.002A0019842	Chr2A:42300680-42308417	Sspon.002B0017161	Chr2B:40699785-40708759	Sspon.002C0020920	Chr2C:46143788-46148050	Sspon.002D0016171	Chr2D:36529910-36534685
SsHAK24	Sspon.008A0012990	8	Sobic.010G112800	Sspon.008A0012990	Chr8A:44554374-44559614	Sspon.008B0013220	Chr8B:39334161-39339183			Sspon.008D0013260	Chr8D:42584078-42589404
SsHAK25	Sspon.004B0003570	4	Sobic.004G250700			Sspon.004B0003570	Chr4B:8302541-8306450	Sspon.004C0005611|Sspon.004C0005640	Chr4C:13055184-13060296|Chr4C:13145083-13149719
SsHAK26	Sspon.006A0002412	6	Sobic.007G209900	Sspon.006A0002412	Chr6A:5550841-5558553	Sspon.006B0001530	Chr6B:3932739-3938230	Sspon.006C0001850	Chr6C:4311931-4319261	Sspon.006D0000841	Chr6D:3015726-3022079
SsHAK27	Sspon.001B0031650	1	Sobic.001G184300	Sspon.001A0027726|Sspon.001A0027724	Chr1A:81662545-81668226|Chr1A:81589926-81592807	Sspon.001B0031650	Chr1B:84623153-84627558	Sspon.001C0027070|Sspon.001C0027050	Chr1C:80615932-80621018|Chr1C:80581502-80586587	Sspon.001D0027960	Chr1D:79308828-79313374
