# Supplementary material for: Genome-wide systematic characterization of the HAK/KUP/KT gene family and its expression profile during plant growth and in response to low-K+ stress in Saccharum
Source: BMC Plant Biol. 2020 Jan 13;20:20. doi: 10.1186/s12870-019-2227-7 (PMC6958797; doi:10.1186/s12870-019-2227-7)
Supplement: Supplementary file 2 — Additional file 2. Similarity between HAK proteins in sugarcane calculated by NCBI BLASTP. [file 12870_2019_2227_MOESM2_ESM.xlsx]

## Sheet: Sheet1
Additional file 2 Similarity between HAK proteins in sugarcane calculated by NCBI BLASTP
	SsHAK1	SsHAK2	SsHAK3	SsHAK4	SsHAK5a	SsHAK5b	SsHAK7	SsHAK8	SsHAK9	SsHAK10	SsHAK11	SsHAK12	SsHAK13	SsHAK14	SsHAK15	SsHAK16a	SsHAK16b	SsHAK17	SsHAK18	SsHAK19a	SsHAK19b	SsHAK20a	SsHAK20b	SsHAK21	SsHAK22	SsHAK23	SsHAK24	SsHAK25	SsHAK26
SsHAK2	0.39
SsHAK3	0.39	0.63
SsHAK4	0.37	0.38	0.41
SsHAK5a	0.57	0.39	0.39	0.35
SsHAK5b	0.53	0.35	0.35	0.31	0.82
SsHAK7	0.33	0.71	0.63	0.32	0.34	0.31
SsHAK8	0.36	0.51	0.49	0.36	0.41	0.33	0.48
SsHAK9	0.37	0.52	0.49	0.38	0.38	0.35	0.48	0.75
SsHAK10	0.42	0.48	0.44	0.4	0.39	0.39	0.44	0.48	0.49
SsHAK11	0.32	0.42	0.4	0.34	0.36	0.33	0.37	0.34	0.34	0.39
SsHAK12	0.34	0.43	0.39	0.3	0.37	0.35	0.41	0.36	0.39	0.34	0.7
SsHAK13	0.4	0.5	0.5	0.43	0.4	0.37	0.44	0.48	0.5	0.52	0.34	0.37
SsHAK14	0.39	0.38	0.39	0.32	0.4	0.36	0.41	0.33	0.37	0.33	0.39	0.41	0.38
SsHAK15	0.39	0.38	0.37	0.33	0.37	0.36	0.34	0.33	0.36	0.31	0.34	0.34	0.38	0.57
SsHAK16a	0.51	0.39	0.35	0.33	0.46	0.45	0.37	0.3	0.31	0.32	0.4	0.37	0.36	0.34	0.35
SsHAK16b	0.54	0.35	0.36	0.34	0.49	0.44	0.32	0.34	0.36	0.39	0.33	0.35	0.38	0.37	0.36	0.73
SsHAK17	0.37	0.42	0.41	0.72	0.41	0.33	0.35	0.39	0.42	0.43	0.35	0.33	0.43	0.34	0.34	0.3	0.35
SsHAK18	0.42	0.46	0.45	0.37	0.43	0.4	0.41	0.41	0.41	0.42	0.67	0.69	0.42	0.43	0.41	0.37	0.39	0.39
SsHAK19a	0.75	0.38	0.43	0.34	0.55	0.5	0.31	0.4	0.37	0.41	0.28	0.3	0.39	0.37	0.37	0.48	0.51	0.34	0.39
SsHAK19b	0.73	0.35	0.42	0.35	0.54	0.48	0.3	0.38	0.34	0.3	0.28	0.3	0.38	0.38	0.36	0.47	0.49	0.38	0.37	0.96
SsHAK20a	0.7	0.41	0.45	0.37	0.56	0.51	0.36	0.4	0.42	0.43	0.48	0.34	0.45	0.37	0.42	0.48	0.49	0.38	0.46	0.7	0.67
SsHAK20b	0.61	0.38	0.38	0.35	0.57	0.52	0.32	0.34	0.37	0.33	0.32	0.37	0.41	0.41	0.39	0.59	0.56	0.4	0.42	0.55	0.56	0.55
SsHAK21	0.56	0.37	0.37	0.35	0.52	0.47	0.34	0.36	0.38	0.41	0.34	0.35	0.4	0.39	0.37	0.62	0.69	0.36	0.4	0.53	0.52	0.51	0.58
SsHAK22	0.52	0.38	0.39	0.34	0.5	0.45	0.29	0.32	0.37	0.42	0.52	0.32	0.35	0.41	0.37	0.49	0.53	0.35	0.36	0.49	0.52	0.54	0.6	0.61
SsHAK23	0.38	0.46	0.42	0.36	0.4	0.33	0.41	0.38	0.39	0.36	0.39	0.39	0.4	0.57	0.49	0.45	0.37	0.38	0.45	0.37	0.37	0.37	0.38	0.37	0.41
SsHAK24	0.3	0.44	0.44	0.41	0.41	0.4	0.46	0.5	0.49	0.6	0.39	0.34	0.43	0.33	0.32	0.34	0.39	0.43	0.36	0.41	0.3	0.43	0.32	0.34	0.38	0.37
SsHAK25	0.38	0.52	0.5	0.36	0.39	0.36	0.52	0.56	0.6	0.68	0.39	0.41	0.5	0.39	0.36	0.34	0.37	0.41	0.45	0.38	0.36	0.38	0.39	0.38	0.38	0.4	0.74
SsHAK26	0.36	0.39	0.39	0.41	0.39	0.36	0.34	0.36	0.37	0.44	0.47	0.33	0.41	0.34	0.36	0.3	0.36	0.42	0.43	0.37	0.35	0.38	0.37	0.39	0.36	0.37	0.41	0.37
SsHAK27	0.54	0.36	0.37	0.36	0.51	0.46	0.33	0.36	0.39	0.41	0.29	0.33	0.41	0.36	0.36	0.61	0.67	0.37	0.4	0.53	0.51	0.51	0.56	0.7	0.59	0.37	0.43	0.39	0.37
